# Supplementary material for: Computational mining of GeH-based Janus III–VI van der Waals heterostructures for solar cell applications
Source: Royal Society of Chemistry journal article supplement (doi:10.1039/d2cp05669k), 2023-01-01
Supplement: d2cp05669k8.pdf [file d2cp05669k8.pdf]

Supporting Information for

**Computational mining of GeH-based Janus III–VI van der Waals**

**heterostructures for solar cell applications**

Ruifeng Li<sup>a</sup>, Zhichao Shi<sup>a</sup>, Rui Xiong<sup>a</sup>, Zhou Cui<sup>a</sup>, Yinggan Zhang<sup>b</sup>, Chao Xu<sup>c</sup>, Jingying Zheng<sup>a</sup>,  
Bo Wu<sup>a</sup>, Baisheng Sa<sup>a,\*</sup> and Cuilian Wen<sup>a,\*\*</sup>

<sup>a</sup> *Multiscale Computational Materials Facility, and Key Laboratory of Eco-materials Advanced Technology, College of Materials Science and Engineering, Fuzhou University, Fuzhou 350100, P. R. China*

<sup>b</sup> *College of Materials, Fujian Provincial Key Laboratory of Theoretical and Computational Chemistry, Xiamen University, Xiamen 361005, P. R. China*

<sup>c</sup> *Xiamen Talentmats New Materials Science & Technology Co., Ltd., Xiamen 361015, P. R. China*

**Corresponding Authors:** [bssa@fzu.edu.cn](mailto:bssa@fzu.edu.cn) (B. Sa), [clwen@fzu.edu.cn](mailto:clwen@fzu.edu.cn) (C. Wen).

**Table S1.** The energy differences of  $\Delta E$  (meV) and interlayer distance  $d$  (Å) as well as the lattice constants  $a$  (Å) for heterostructures

| System                   | Configuration | $\Delta E$ | $d$   | $a$   |
|--------------------------|---------------|------------|-------|-------|
| Ga <sub>2</sub> SeTe/GeH | d             | 77         | 3.155 | 4.000 |
|                          | e             | 0          | 2.359 | 4.007 |
|                          | f             | 3          | 2.282 | 4.011 |
| In <sub>2</sub> SSe/GeH  | d             | 82         | 2.965 | 4.011 |
|                          | e             | 4          | 2.160 | 4.017 |
|                          | f             | 0          | 2.038 | 4.023 |
| In <sub>2</sub> STe/GeH  | d             | 85         | 3.112 | 4.087 |
|                          | e             | 0          | 2.277 | 4.096 |
|                          | f             | 5          | 2.223 | 4.100 |
| In <sub>2</sub> SeTe/GeH | d             | 88         | 3.138 | 4.126 |
|                          | e             | 0          | 2.221 | 4.135 |
|                          | f             | 3          | 2.195 | 4.141 |

**Table S2.** The electron gains of the isolated In<sub>2</sub>STe  $\sum P_{\text{In}_2\text{STe}}$  (*e*), and GeH monolayers  $\sum P_{\text{GeH}}$  (*e*) based on different methods

| Method                        | $\sum P_{\text{GeH}}$ | $\sum P_{\text{In}_2\text{STe}}$ |
|-------------------------------|-----------------------|----------------------------------|
| Differential Charge Densities | 0.000019              | -0.000019                        |
| Bader Charge                  | 0.012                 | -0.012                           |

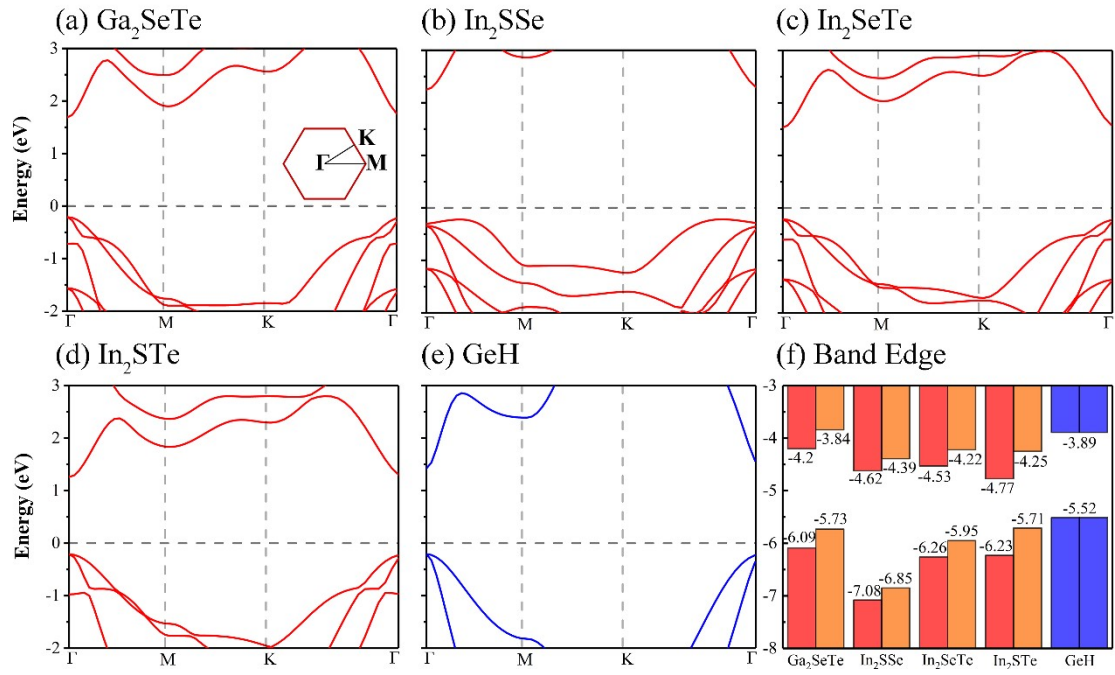

**Figure S1.** HSE06 band structures of (a) Ga<sub>2</sub>SeTe, (b) In<sub>2</sub>SSe, (c) In<sub>2</sub>SeTe, (d) In<sub>2</sub>STe and (e) GeH monolayers. The first Brillouin zone with high-symmetry points is shown in the inset of (a). (f) The band edge alignments for the monolayers. The red pillars indicate the band edge alignments of the X side, and the orange pillars indicate the band edge alignments of the Y side.

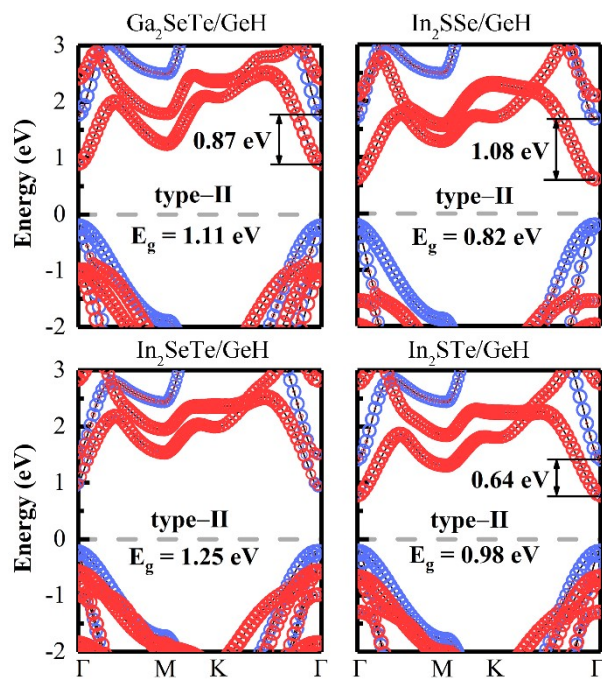

**Figure S2.** Projected HSE06 band of the most stable  $M_2XY/GeH$  vdW heterostructures among configurations (a) to (c). Red and blue circles represent the projected weights of  $M_2XY$  and GeH monolayers, respectively.

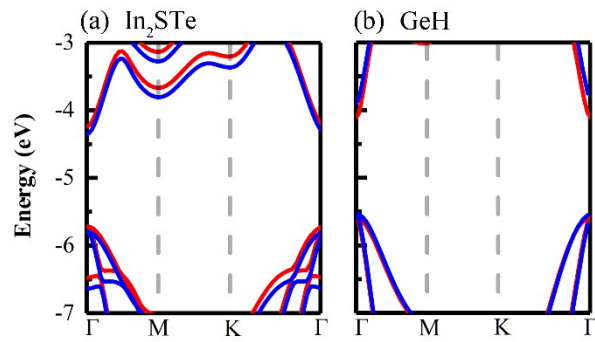

**Figure S3.** HSE06 band structures of (a) In<sub>2</sub>SeTe and (b) GeH monolayers. Red and blue curves represent the band structures for intrinsic monolayers and the mutually independent monolayers fixed in the lattice of In<sub>2</sub>STe/GeH vdW heterostructure, respectively.

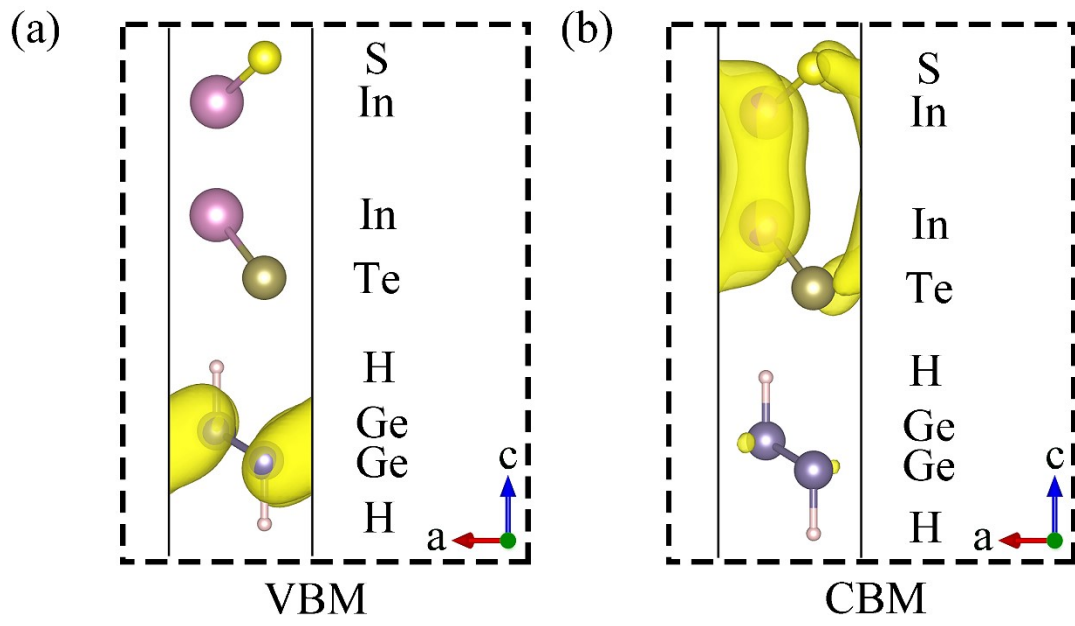

**Figure S4.** Band-decomposed charge density of the (a) VBM and (b) CBM for  $\text{In}_2\text{STe}/\text{GeH}$  heterostructure.

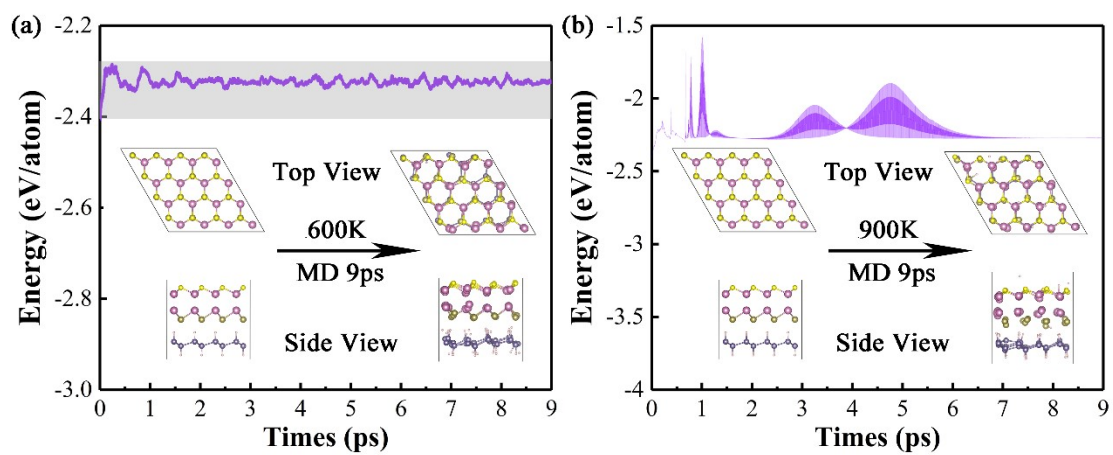

**Figure S5.** Total energy changes and structure snapshots from AIMD calculations at (a) 600 K and (b) 900 K of  $\text{In}_2\text{STe}/\text{GeH}$  vdW heterostructure.



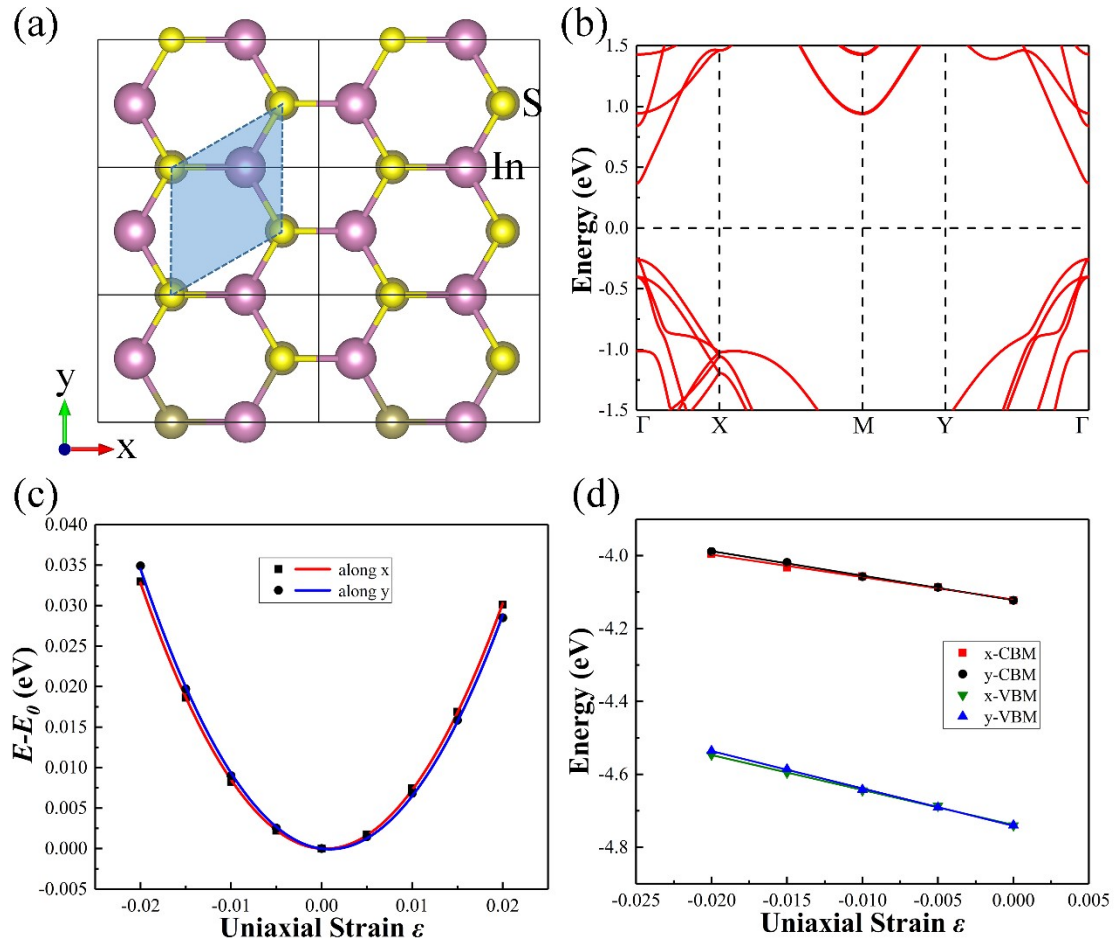

**Figure S6.** (a) Using an orthorhombic lattice to calculate  $\text{In}_2\text{STe}/\text{GeH}$  vdW heterostructure and the blue shaded quad indicates the initial hexagonal lattice. (b) Band structure of  $\text{In}_2\text{STe}/\text{GeH}$  vdW heterostructure by the PBE method. (c) Total energy shift  $E - E_0$  and (d) Band edge positions of  $\text{In}_2\text{STe}/\text{GeH}$  vdW heterostructure as functions of the uniaxial strain  $\epsilon$  along with both the armchair (x) and zigzag (y) directions by the PBE method. The vacuum level is set to 0 for reference in (d) figure.
