# Supplementary figures and images for: Computational mining of GeH-based Janus III–VI van der Waals heterostructures for solar cell applications
Source: Royal Society of Chemistry journal article supplement (doi:10.1039/d2cp05669k), 2023-01-01

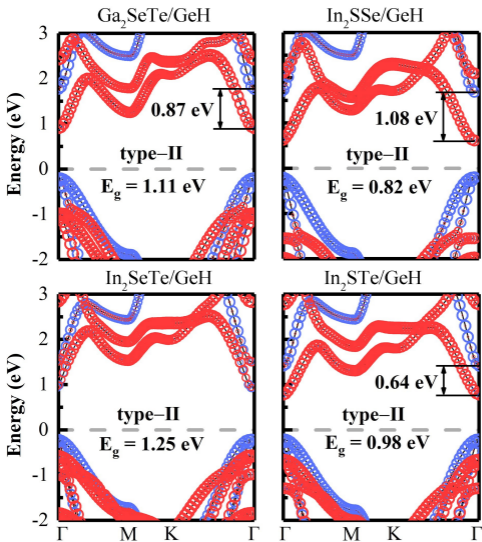

Supplement: d2cp05669k3.pdf [file d2cp05669k3.pdf]

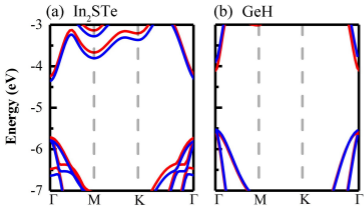

Supplement: d2cp05669k4.pdf [file d2cp05669k4.pdf]

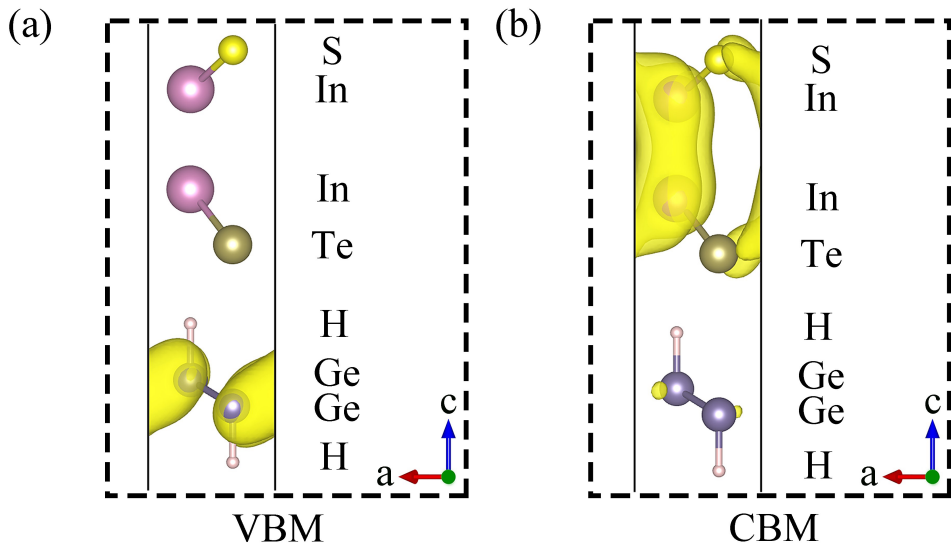

Supplement: d2cp05669k5.pdf [file d2cp05669k5.pdf]

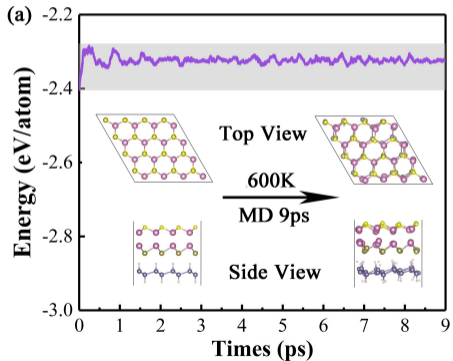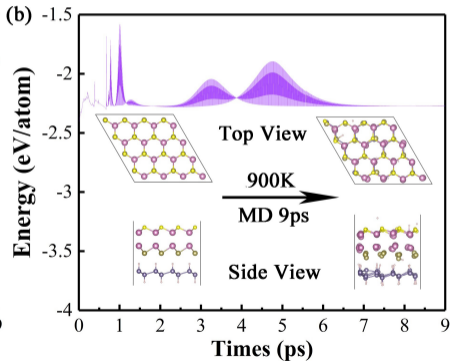

Supplement: d2cp05669k6.pdf [file d2cp05669k6.pdf]

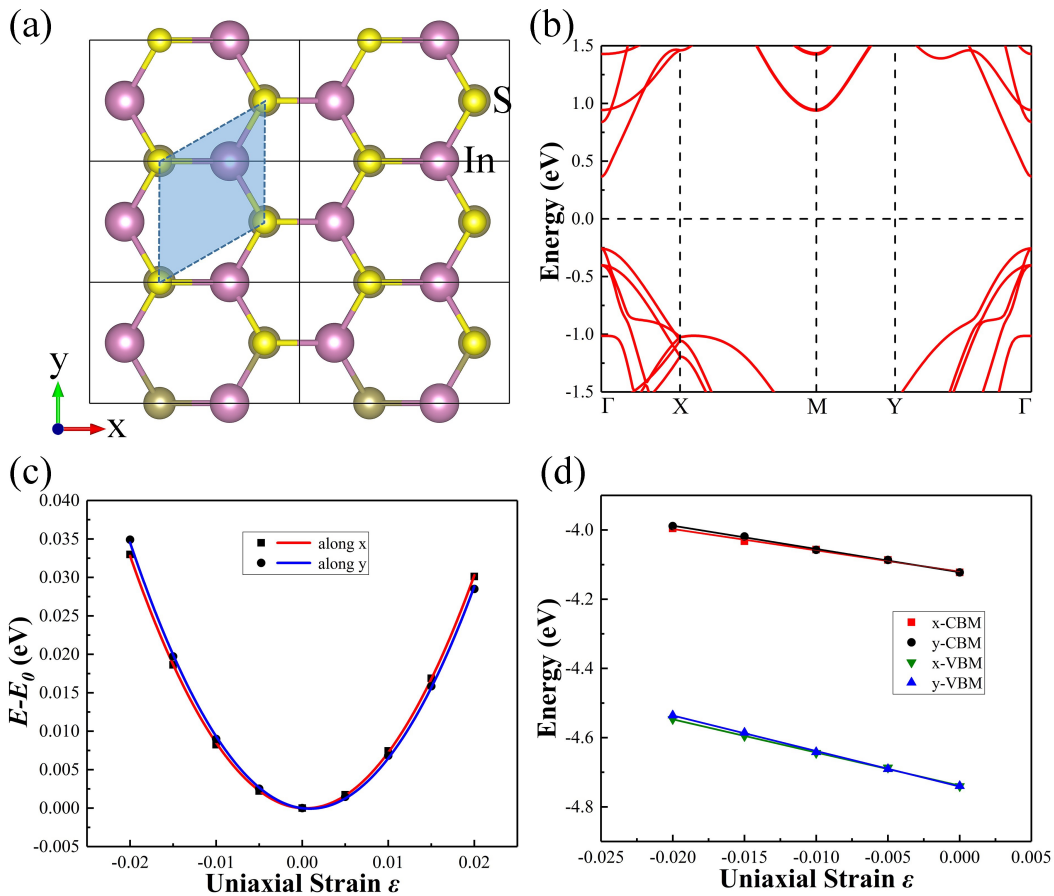

Supplement: d2cp05669k7.pdf [file d2cp05669k7.pdf]
